# Supplementary material for: Synthesis and gas sorption properties of a homochiral metal–organic framework with octahedral cages
Source: Royal Society of Chemistry journal article supplement (doi:10.1039/c5ce01094b), 2015-01-01
Supplement: c5ce01094b1.pdf [file c5ce01094b1.pdf]

*Electronic Supplementary Information (ESI) for*

**Synthesis and gas sorption property of a homochiral metal–organic  
framework with octahedral cages**

Zhongxuan Xu<sup>1,2</sup>, Xin Wu<sup>1</sup>, Juan Liu<sup>1</sup>, Yao Kang<sup>1</sup> and Jian Zhang<sup>1,\*</sup>

*<sup>1</sup>State Key Laboratory of Structural Chemistry, Fujian Institute of Research on the  
Structure of Matter, the Chinese Academy of Sciences, Fuzhou, Fujian 350002, P. R. China.*

*<sup>2</sup>Department of Chemistry, Zunyi Normal College, Zunyi, Guizhou 563002, P. R. China*

*E-mail: zhj@fjirsm.ac.cn .*

## Experimental Section

**General information:** All of the reagents and solvents used in reactions were purchased commercially and used without purification, unless otherwise indicated. The chiral ligands (S)-H<sub>3</sub>PIA and (R)-H<sub>3</sub>PIA were synthesized from L-proline, D-proline and benzene-1,3,5-tricarboxylic acid by our group. Elemental analyses were carried out by the analysis center of our institute. All Powder X-ray diffraction (PXRD) analyses were recorded on a Rigaku Dmax2500 diffractometer with Cu K  $\alpha$  radiation ( $\lambda = 1.54056 \text{ \AA}$ ). Thermal stability studies were performed on a NETSCHZ STA-449C thermoanalyzer with a heating rate of 10°C/min under an N<sub>2</sub> atmosphere in the range of 30~800°C.

**Synthesis of [Cu<sub>3</sub>((S)-PIA)<sub>2</sub>(pyridine)<sub>3</sub>(H<sub>2</sub>O)]·THF·6.25H<sub>2</sub>O (1-L):** A mixture of (S)-H<sub>3</sub>PIA (31 mg, 0.1 mmol) and Cu(NO<sub>3</sub>)<sub>2</sub>·2.5H<sub>2</sub>O (47 mg, 0.2 mmol) was dissolved in a mixed solvent of THF and H<sub>2</sub>O (3 mL/1 mL) with two drops of pyridine in a Teflon reactor. The reaction mixture was heated at 100°C for 48 hours and then cooled to room temperature. Green-blue block crystals (32 mg, 60%, based on (S)-H<sub>3</sub>PIA) were obtained after filtration. Elemental analysis calcd (%) for **1-L**: C 47.35, H 3.97, N 5.26; found C 46.48, H 4.12, N 5.45

**Synthesis of [Cu<sub>3</sub>((R)-PIA)<sub>2</sub>(pyridine)<sub>3</sub>(H<sub>2</sub>O)]·THF·6.25H<sub>2</sub>O (1-D):** The same procedure as **1-L**, except (R)-H<sub>3</sub>PIA was used. Green-blue powdery crystals (19 mg, 35%, based on (R)-H<sub>3</sub>PIA) were obtained after filtration. Elemental analysis calcd (%) for **1-D**: C 47.35, H 3.97, N 5.56; found C 46.71, H 4.11, N 5.31.

**Measurements of solid CD spectra:** The mixture of sample and 50 mg dry KCl powder was well grounded and then pressed into a disk for the CD measurement with a MOS-450 spectropolarimeter.

**Gas adsorption measurement:** A freshly prepared sample of **1-L** was also soaked in acetone at 40°C for three days to exchange guest molecules. Subsequently, the sample was degassed under dynamic vacuum at 80°C for 5 h to activate the sample. Finally, gas adsorption measurements was performed in the ASAP (Accelerated Surface Area and Porosimetry) 2020 System.

Table S1. Summary of Crystal Data and Refinement Results

|                                              |                                                            |
|----------------------------------------------|------------------------------------------------------------|
| Compound reference                           | 1-L                                                        |
| Chemical formula                             | $C_{38}H_{30}Cu_3N_4O_{15} \cdot C_4H_8O \cdot 6.25(H_2O)$ |
| Formula Mass                                 | 1160.00                                                    |
| Crystal system                               | Monoclinic                                                 |
| $a/\text{\AA}$                               | 20.7929(8)                                                 |
| $b/\text{\AA}$                               | 12.4871(7)                                                 |
| $c/\text{\AA}$                               | 19.5025(9)                                                 |
| $\alpha/^\circ$                              | 90.00                                                      |
| $\beta/^\circ$                               | 97.329(4)                                                  |
| $\gamma/^\circ$                              | 90.00                                                      |
| Unit cell volume/ $\text{\AA}^3$             | 5022.3(4)                                                  |
| Temperature/K                                | 293(2)                                                     |
| Space group                                  | C2                                                         |
| No. of formula units per unit cell, $Z$      | 4                                                          |
| Radiation type                               | CuK $\alpha$                                               |
| Absorption coefficient, $\mu/\text{mm}^{-1}$ | 2.204                                                      |
| No. of reflections measured                  | 9300                                                       |
| No. of independent reflections               | 6627                                                       |
| $R_{int}$                                    | 0.0323                                                     |
| Final $R_I$ values ( $I > 2\sigma(I)$ )      | 0.0549                                                     |
| Final $wR(F^2)$ values ( $I > 2\sigma(I)$ )  | 0.1330                                                     |
| Final $R_I$ values (all data)                | 0.0668                                                     |
| Final $wR(F^2)$ values (all data)            | 0.1418                                                     |
| Goodness of fit on $F^2$                     | 1.108                                                      |
| Flack parameter                              | -0.03(4)                                                   |

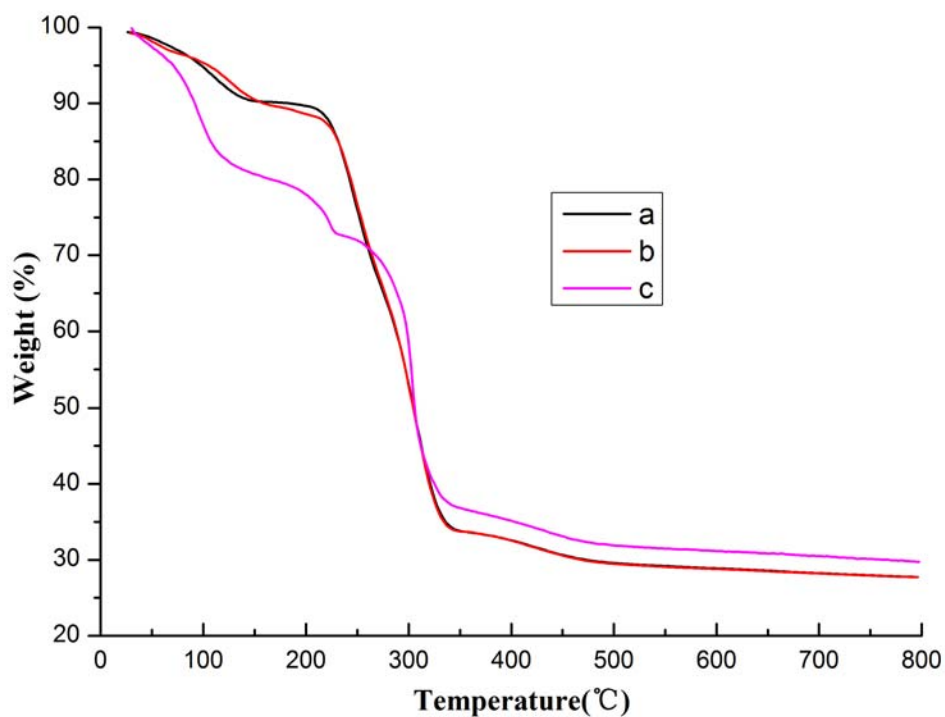

Figure S1. The TGA diagrams of **1-L** (a), the TGA diagrams of **1-D** (b) and the TGA diagrams of **1-L** soaked in acetone (c).

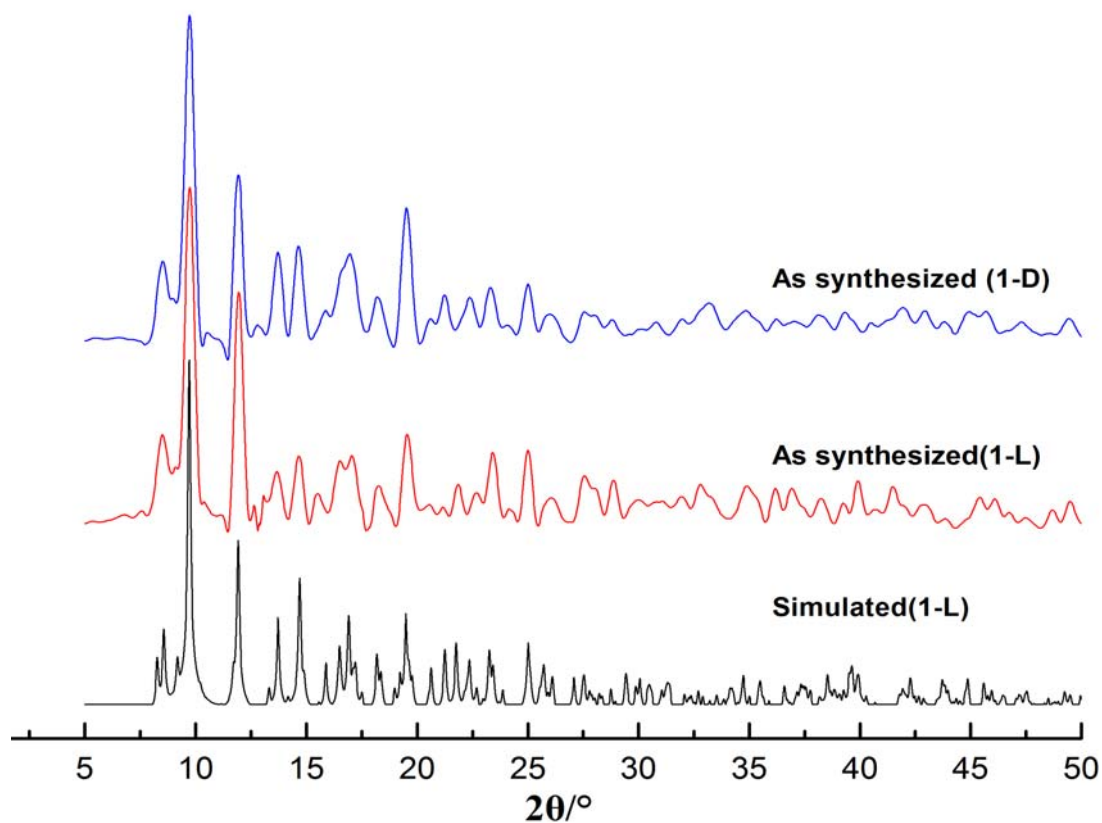

Figure S2. XRPD patterns of **1-D** and **1-L**.

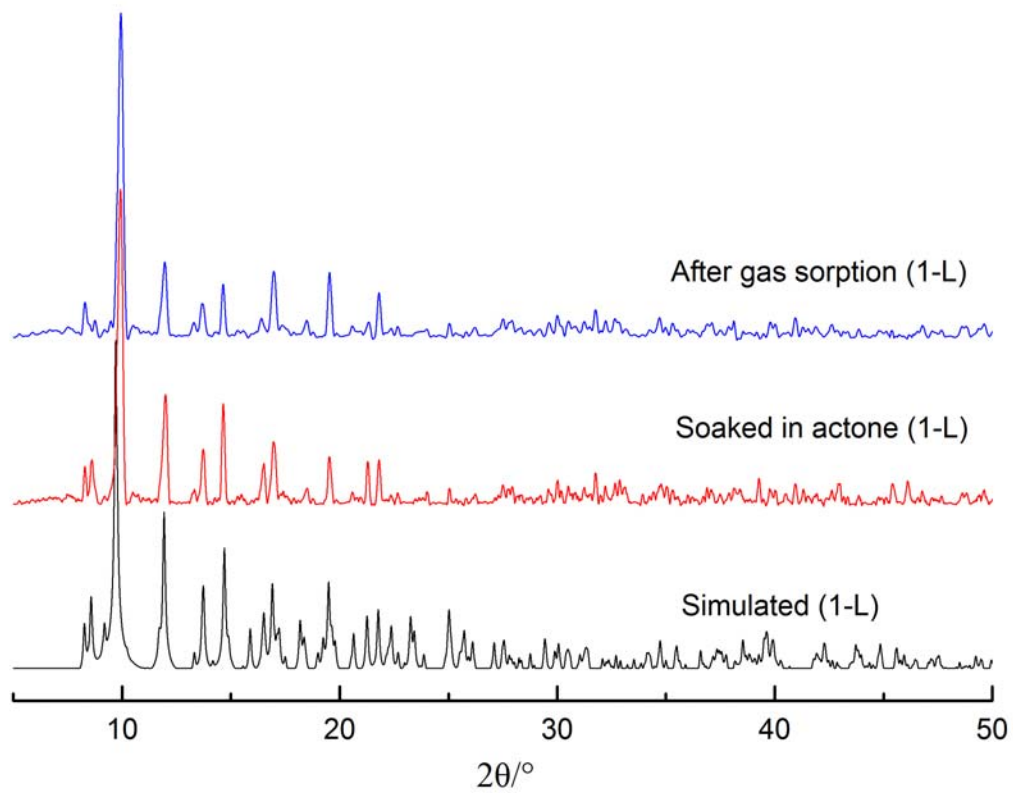

Figure S3. XRPD patterns of **1-L**.
